# Supplementary material
Source: PubMed Central journal article supplement (PMC3877849)
Supplement: NIHMS529672-supplement-Supp_FigS1-S2-TableS1.pdf [file NIHMS529672-supplement-Supp_FigS1-S2-TableS1.pdf]

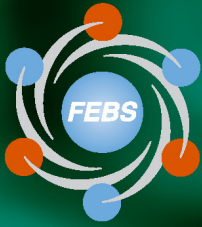

WILEY  
Blackwell

the **FEBS**  
Journal

[www.febsjournal.org](http://www.febsjournal.org)

# **G-protein coupled receptor 56 promotes myoblast fusion through serum response factor- and nuclear factor of activated T-cell-mediated signalling but is not essential for muscle development *in vivo***

Melissa P. Wu, Jamie R. Doyle, Brenda Barry, Ariane Beauvais, Anete Rozkalne, Xianhua Piao, Michael W. Lawlor, Alan S. Kopin, Christopher A. Walsh and Emanuela Gussoni

DOI: 10.1111/febs.12529

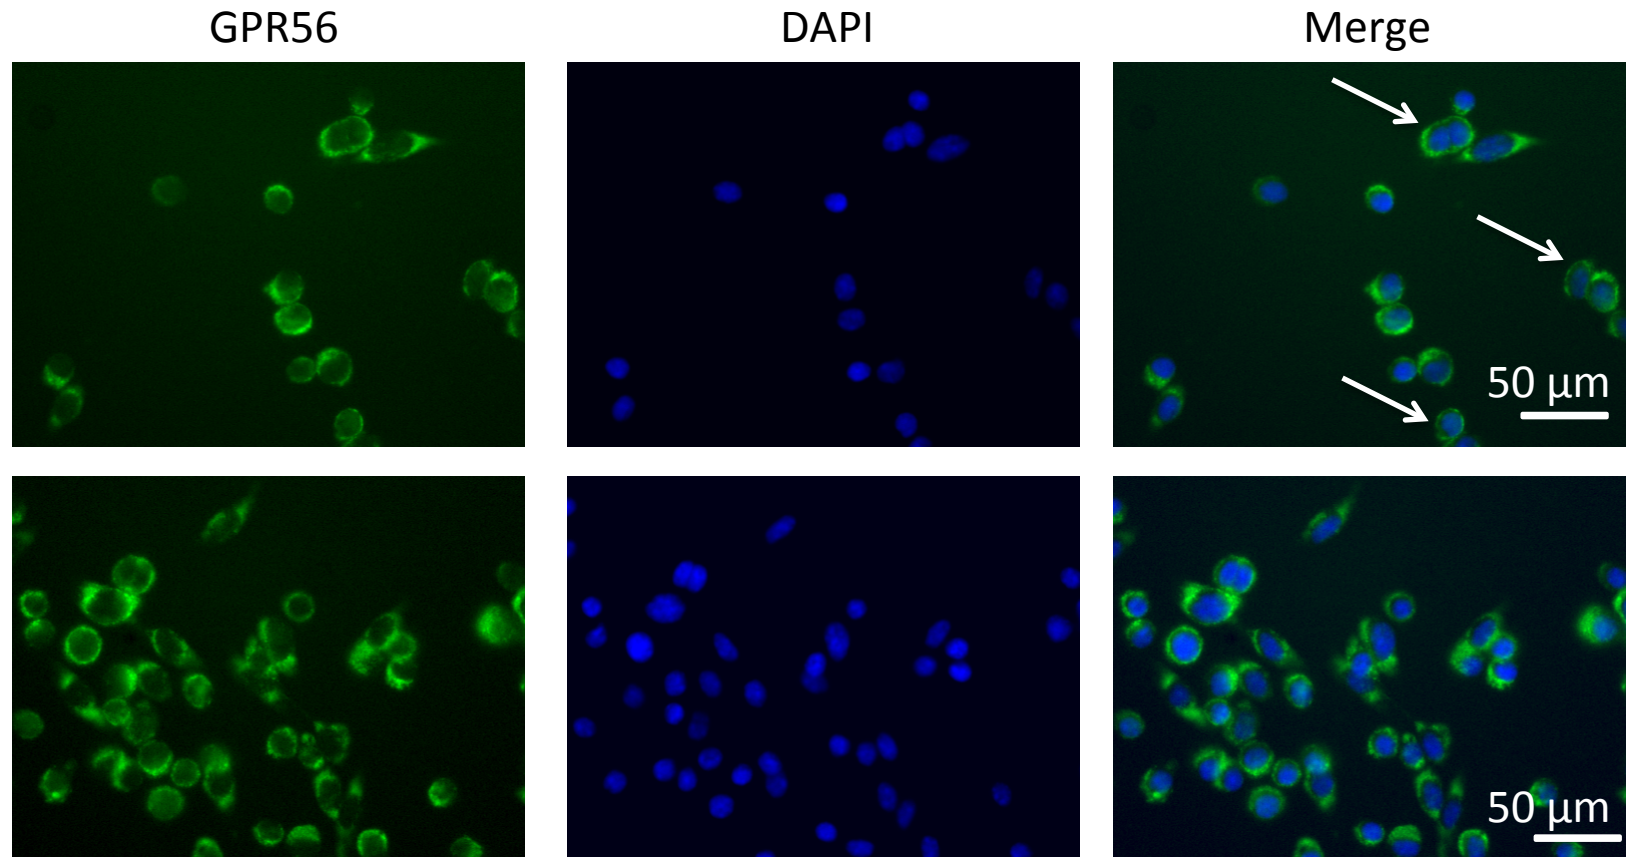

**Figure S1.** GPR56 localization at the membrane of primary WT myoblasts undergoing differentiation (day2). Cells were fixed in acetone for 10 minutes at -20°C and incubated with anti-H11 antibody overnight at 4°C. Arrows point at GPR56 localized to the cell membrane.

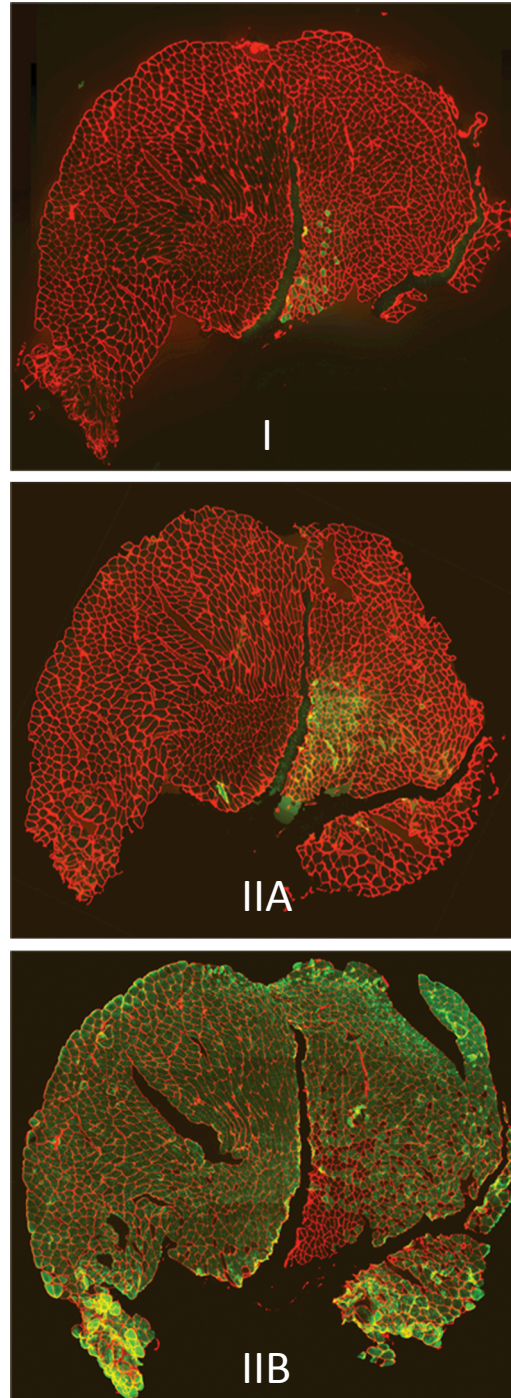

**Figure S2.** Myosin heavy chain staining of muscle tissue. Representative sequential sections of MHC I, MHC IIA, and MHC IIB staining (green) of gastrocnemius muscle. Individual myofibers are outlined with laminin staining (red).

**Supplementary Table 1. RT-qPCR primer sequences and concentrations**

| <b>Gene</b>   | <b>Forward primer<br/>(5'→3')</b> | <b>Final<br/>conc.<br/>(nM)</b> | <b>Reverse primer<br/>(5'→3')</b> | <b>Final<br/>conc.<br/>(nM)</b> |
|---------------|-----------------------------------|---------------------------------|-----------------------------------|---------------------------------|
| B2M           | ctgaccggcctgtatgctat              | 50                              | ccgttcttcagcatttgat               | 50                              |
| GAPDH         | aactttggcattgtggaagg              | 50                              | acacattgggggtaggaaca              | 50                              |
| GPR56         | gtgaataactacggccccatt             | 300                             | catagcgacgttgaacaggaa             | 200                             |
| Myf5          | ggcatgcctgaatgtaacag              | 100                             | gacacggagcctttatctgc              | 100                             |
| MyoD          | tacagtggcgactcagatgc              | 37.5                            | cggtgtcgtcgcattctg                | 37.5                            |
| Myogenin      | cagtgaatgcaactcccaca              | 100                             | caaatgatctcctgggttg               | 100                             |
| NFATc1        | acatgacggggctggag                 | 200                             | cataactgtagtgttctgctcggc          | 400                             |
| NFATc2        | atgtgagcaggaggagagga              | 300                             | tggacctcaatccgtagctc              | 200                             |
| NFATc3        | gaaaaatgtcaaggggctca              | 50                              | gcaaagatggaactgaaggc              | 50                              |
| NFATc4        | gccgcaagctgcgaggatga              | 200                             | tccccaggggccaaacgaca              | 100                             |
| FHL1-1        | caacctccggggcaggcatc              | 200                             | gcctttaccaaacccgggcttc            | 400                             |
| Embryonic MHC | cgcagaatcgcaagtcaata              | 100                             | caggaggtcttctcactcc               | 100                             |
